# Supplementary material for: One-pot gradient solvothermal synthesis of Au–Fe3O4 hybrid nanoparticles for magnetically recyclable catalytic applications
Source: Royal Society of Chemistry journal article supplement (doi:10.1039/c3ta12141k), 2013-01-01
Supplement: c3ta12141k.pdf [file c3ta12141k.pdf]

## Electronic Supplementary Information

# One-pot gradient solvothermal synthesis of the Au-Fe<sub>3</sub>O<sub>4</sub> hybrid nanoparticles for magnetically recyclable catalytic applications

*Xianwei Meng,<sup>a</sup> Bo Li,<sup>a,b</sup> Xiangling Ren,<sup>a</sup> Longfei Tan,<sup>a</sup> Zhongbing Huang<sup>b\*</sup> and  
Fangqiong Tang<sup>a\*</sup>*

<sup>a</sup> Laboratory of Controllable Preparation and Application of Nanomaterials, Technical Institute of Physics and Chemistry, Chinese Academy of Sciences, Beijing, 100190, China. E-mail: tangfq@mail.ipc.ac.cn; Fax: +86-10-62554670; Tel: +86-10-82543521

<sup>b</sup> College of Materials Science and Engineering, Sichuan University, Chengdu, 610065, China. E-mail: zbhuang@scu.edu.cn; Fax: +86-28-85413003; Tel: +86-28-85413003

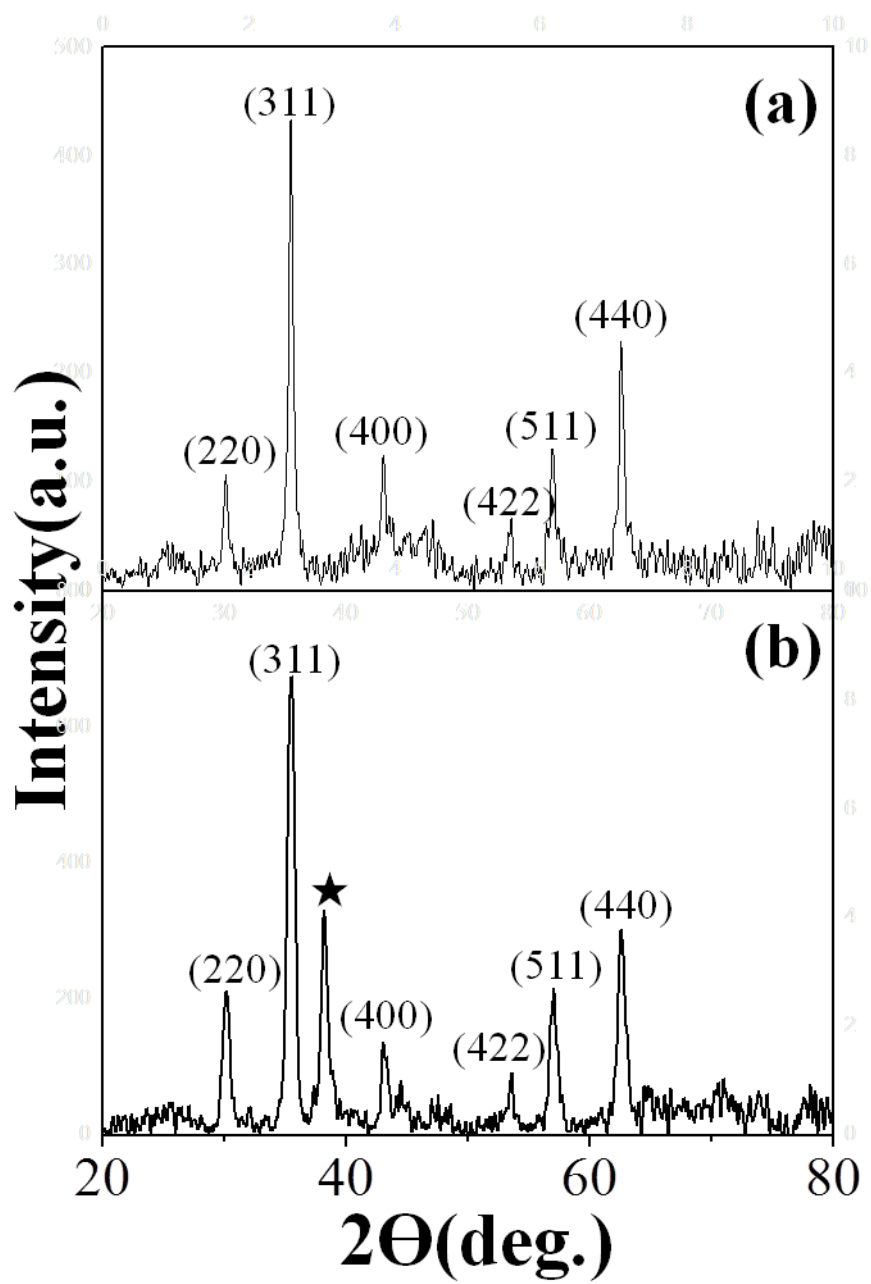

Figure S1. The XRD patterns of the synthesized Fe<sub>3</sub>O<sub>4</sub> and Au-Fe<sub>3</sub>O<sub>4</sub> hybrid NPs, with ★ identifying the Au peak and the numbers indexing the Fe<sub>3</sub>O<sub>4</sub> peaks.

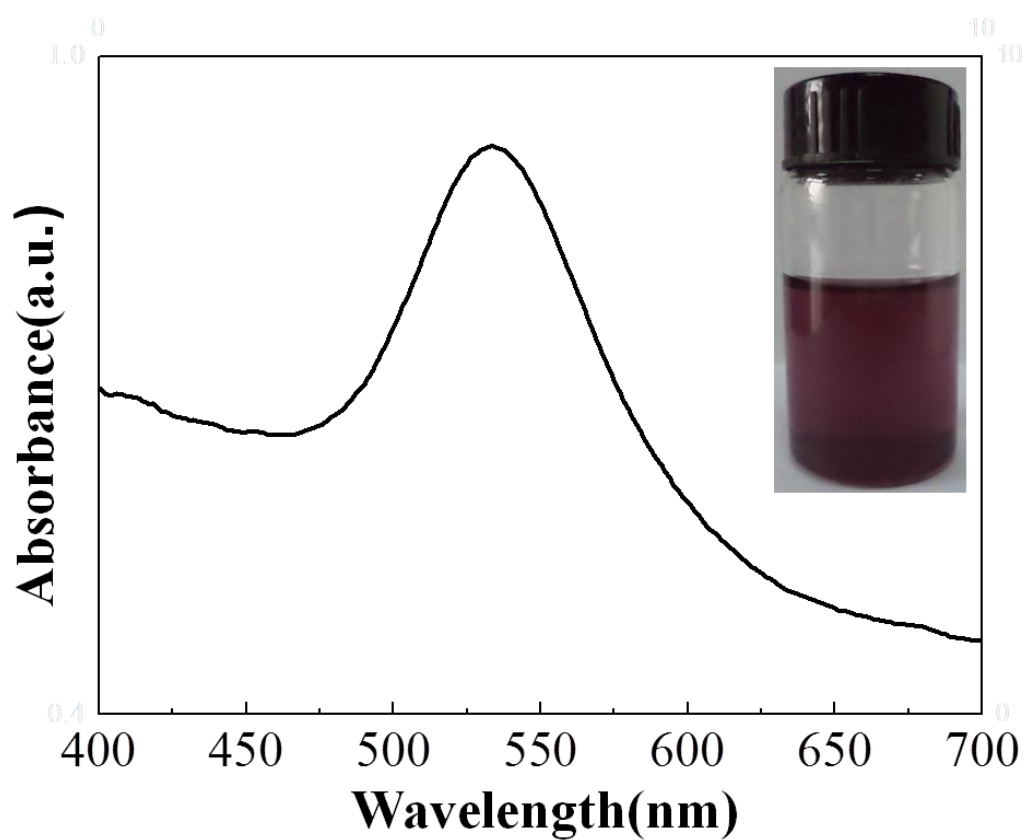

Figure S2. UV/Vis absorption spectrum of the Au NPs; the inset is a digital photograph of the Au NPs dispersed in PG.

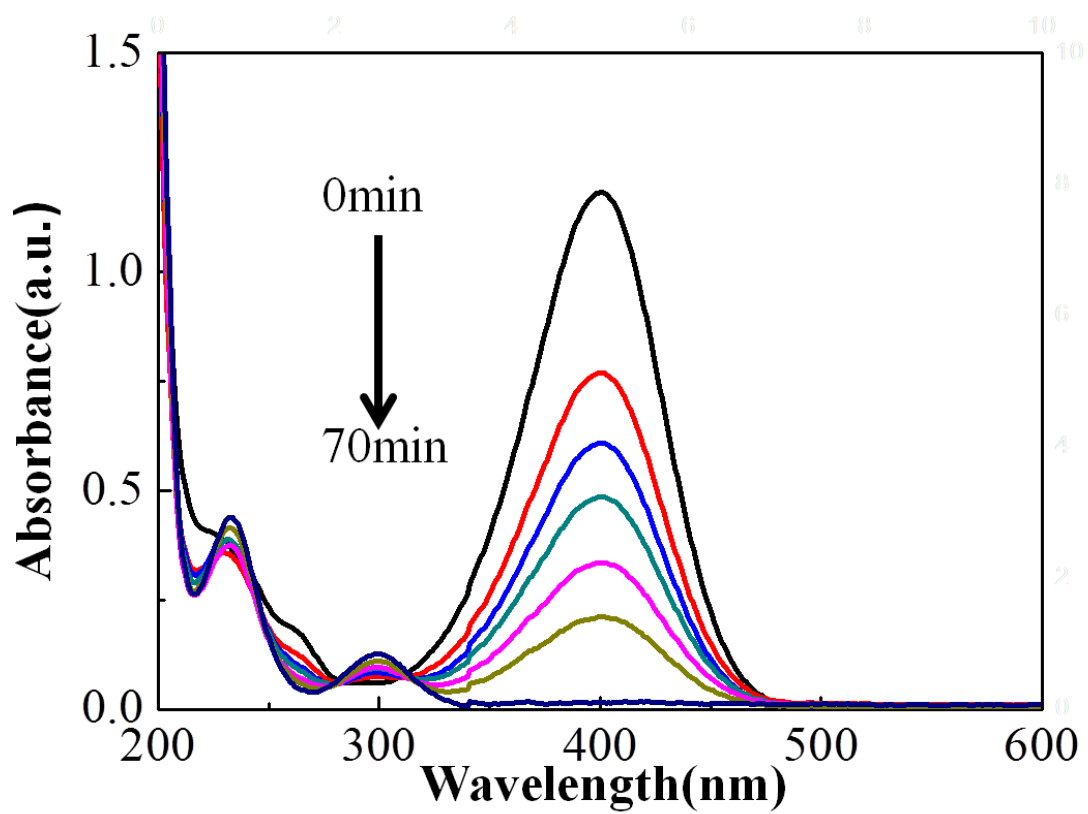

Figure S3. UV/Vis absorption spectrum of 4-NP catalyzed by the Au NPs.

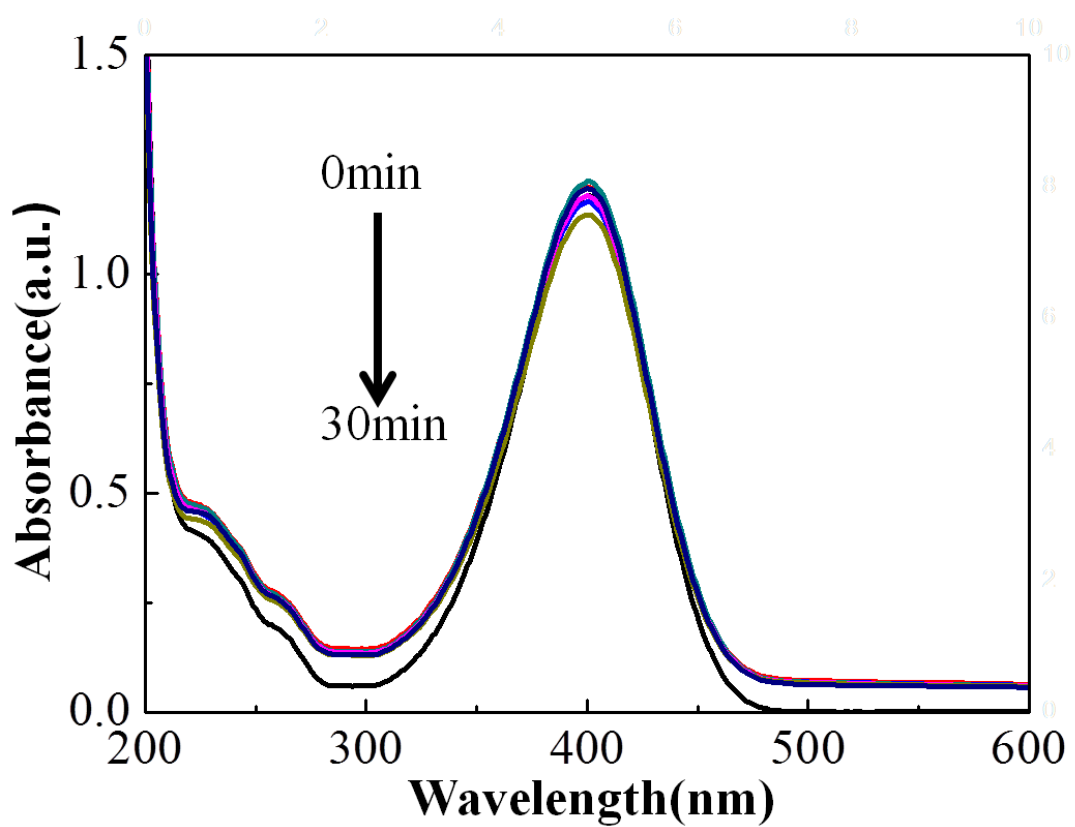

Figure S4. UV/Vis absorption spectrum of 4-NP catalyzed by the Fe<sub>3</sub>O<sub>4</sub> NPs.

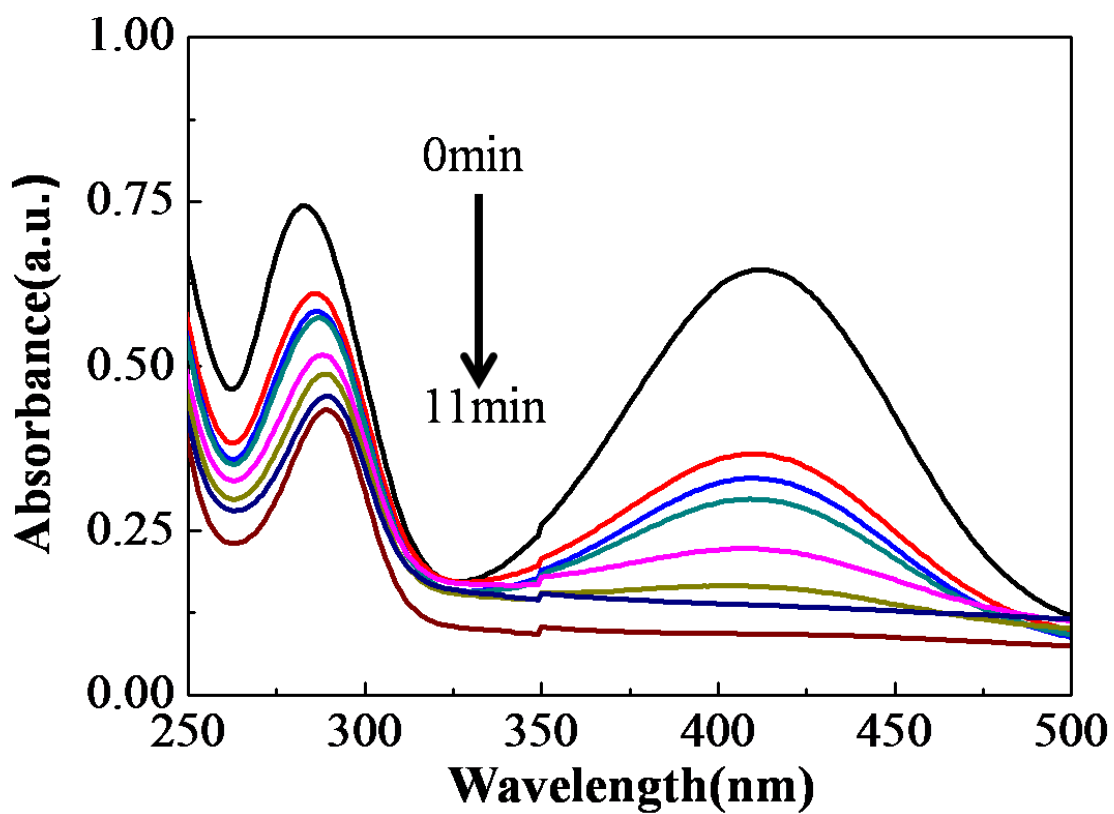

Figure S5. UV/Vis absorption spectrum of 2-NA catalyzed by the Au-Fe<sub>3</sub>O<sub>4</sub> hybrid NPs.

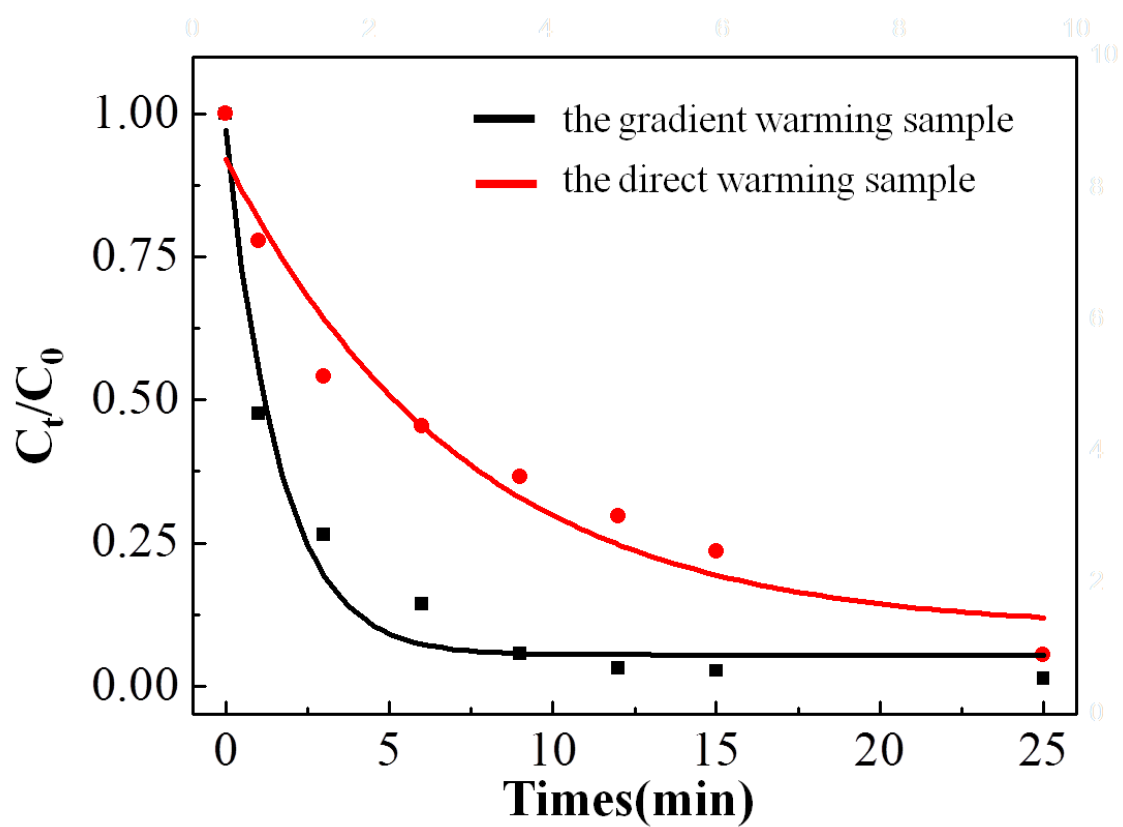

Figure S6. The  $C_t/C_0$  concentration of the 4-NP catalyzed by the Au-Fe<sub>3</sub>O<sub>4</sub> hybrid NPs under the gradient temperature or constant temperature, respectively.
